# Supplementary material for: Biosurfactant-containing products from an environmental perspective – life cycle assessment of a liquid laundry detergent and a personal care product
Source: Royal Society of Chemistry journal article supplement (doi:10.1039/d5su00168d), 2025-12-17
Supplement: d5su00168d1.pdf [file d5su00168d1.pdf]

## Additional information to: Biosurfactant-containing products from an environmental perspective - Life Cycle Assessment of a liquid laundry detergent and a personal care product

Lea Gavez<sup>a</sup>, Lars Bippus<sup>\*,a</sup>, Ann-Kathrin Briem<sup>a,b</sup> and Stefan Albrecht<sup>a,b</sup>

<sup>a</sup> University of Stuttgart, Institute for Acoustics and Building Physics IABP, Department Life Cycle Engineering GaBi, Stuttgart, Germany.

<sup>b</sup> Fraunhofer Institute for Building Physics IBP, Department Life Cycle Engineering GaBi, Stuttgart, Germany.

Table A: Liquid detergent formulation with conventional surfactants or biosurfactant and assumptions for modelling.

| Component                                        | Mass percentage [%] | Note on assumptions in modelling                                                       |
|--------------------------------------------------|---------------------|----------------------------------------------------------------------------------------|
| Citric acid                                      | 2.280               |                                                                                        |
| Phosphonates                                     | 0.410               |                                                                                        |
| Enzymes                                          | 0.580               | Approximation via glucose                                                              |
| Alkyl ether sulfates                             | 4.620*              | C12-14 alcohol ether sulfates (oleo-based)                                             |
| Linear alkylbenzene sulfonates                   | 6.830*              | Soap agent (sodium alkylbenzenesulfonate)                                              |
| Soap C >12-22                                    | 2.410*              | Estimation via stoichiometry: reaction between stearic acid and sodium hydroxide       |
| Alcohol ethoxylates C8-18, 0-22 EO               | 5.910*              | Mix of 5 ethoxylate data sets (3 oleo and 2 petro) in equal parts                      |
| Biosurfactant MEL<br>(mannosylerythritol lipids) | 19.770**            | 1:1 replacement of conventional surfactants*                                           |
| Sodium hydroxide                                 | 2.310               | Sodium hydroxide 100%                                                                  |
| Triethanolamine                                  | 2.310               |                                                                                        |
| Glycerin                                         | 2.850               | Glycerin (refined), by-product rapeseed methyl ester (RME)                             |
| Propylene glycol                                 | 2.850               |                                                                                        |
| 1,2-Benzisothiazol-3-one                         | 0.072               |                                                                                        |
| Sodium chloride                                  | 1.850               |                                                                                        |
| Water (demineralized)                            | 64.718              | Water (desalinated, deionized)                                                         |
| Total                                            | = 100               | Either use of conventional surfactants (19.77%) or biosurfactant MEL (19.77%)          |
|                                                  |                     | Energy consumption per production of 100 kg of liquid detergent:<br>16 kWh electricity |

\* Conventional surfactant

\*\* Biosurfactant MEL

Table B: Cosmetic cream formulation with conventional surfactants or biosurfactant and assumptions for modelling.

| <b><u>Component</u></b>                                                                                | <b><u>Mass percentage [%]</u></b> | <b><u>Note on assumptions in modelling</u></b>                                               |
|--------------------------------------------------------------------------------------------------------|-----------------------------------|----------------------------------------------------------------------------------------------|
| Glycerin monostearate                                                                                  | 2.0*                              | Estimation based on stoichiometry: reaction between stearic acid and glycerin                |
| Cetyl alcohol                                                                                          | 3.0*                              | C16-18 fatty alcohol (from palm oil)                                                         |
| Octyldodecanol                                                                                         | 2.0*                              | 1-Dodecanol                                                                                  |
| Cetyl phosphate                                                                                        | 0.4*                              | Estimation based on stoichiometry: reaction between C16-18 fatty alcohol and phosphoric acid |
| Biotensid MEL<br>(mannosylerythritol lipids)                                                           | 7.4**                             | 1:1 replacement of conventional surfactants                                                  |
| Paraffin oil, subliquidum                                                                              | 15.0                              | White mineral oil                                                                            |
| Vaseline                                                                                               | 3.0                               | Wax/paraffins                                                                                |
| Caprylic/capric acid triglyceride                                                                      | 4.0                               | Octanoic acid                                                                                |
| Hydrogenated coconut oil                                                                               | 2.0                               | Crude coconut oil                                                                            |
| Glycerin                                                                                               | 3.0                               | Glycerol (refined), by-product Rapeseed methyl ester (RME)                                   |
| Benzoic acid (preservative)                                                                            | 0.6                               | Benzoic acid (from toluene)                                                                  |
| Sodium hydroxide                                                                                       | q.s.                              | As much as necessary (abbreviated "q.s.") for pH=6.5; assumption: 0                          |
| Water (demineralized)                                                                                  | 65.0                              | Water (desalinated, deionized)                                                               |
| Total                                                                                                  | = 100                             | Either use of conventional surfactants (7.4%) or biosurfactant MEL (7.4%)                    |
| Energy requirement per production of 100 kg of cosmetic cream:<br>0.6 kWh electricity and 8.5 kg steam |                                   |                                                                                              |

\* Conventional surfactant

\*\* Biosurfactant MEL
